# Supplementary material for: Feedback on the Implementation of a Rapid and Connectable Point-of-Care COVID-19 Antigen Test in an Emergency Department
Source: MDPI journal article supplement (doi:10.3390/diagnostics13233508), 2023-11-22
Supplement: s1 [file s1]

## Supplementary Materials:

**Table S1.** Positive percent agreement of LumiraDx SARS-CoV-2 Ag Ultra test with RT-PCR depending on the Ct value considered.

| <b>LumiraDx SARS-CoV-2 Ag Ultra (5 min)</b> |          |                                                     |
|---------------------------------------------|----------|-----------------------------------------------------|
| <i>versus</i> RT-PCR                        |          |                                                     |
| <b>Grouping</b>                             | <b>N</b> | <b>Positive percent agreement<br/>(sensitivity)</b> |
| <b>Ct (all)</b>                             | 30       | 74.2                                                |
| <b>Ct ≤ 33</b>                              | 24       | 91.7                                                |
| <b>Ct ≤ 30</b>                              | 21       | 100                                                 |
| <b>Ct ≤ 25</b>                              | 13       | 100                                                 |
| <b>Ct ≤ 20</b>                              | 6        | 100                                                 |

*Ct : cycle threshold / RT-PCR : reverse transcriptase polymerase chain reaction.*

**Table S2.** Positive percent agreement of LumiraDx SARS-CoV-2 Ag test with RT-PCR depending on the Ct value considered.

| <b>LumiraDx SARS-CoV-2 Ag (12 min)</b> |          |                                                     |
|----------------------------------------|----------|-----------------------------------------------------|
| <b>Grouping</b>                        | <b>N</b> | <b>Positive percent agreement<br/>(sensitivity)</b> |
| <b>Ct (all)</b>                        | 30       | 71.0                                                |
| <b>Ct ≤ 33</b>                         | 24       | 87.5                                                |
| <b>Ct ≤ 30</b>                         | 21       | 100                                                 |
| <b>Ct ≤ 25</b>                         | 13       | 100                                                 |
| <b>Ct ≤ 20</b>                         | 6        | 100                                                 |

*Ct : cycle threshold / RT-PCR : reverse transcriptase polymerase chain reaction.*
